# Supplementary material
Source: Springer Nature journal article supplement (https://www.springermedizin.de/resource/supplementary/12889_2011_4155_MOESM1_ESM.pdf/9491626)

1974

1981

1991

2000

Controlling  
health 1974

Controlling  
health 1981

Controlling  
health 1991

Cohort\_74  
15-19 y.of a.  
n=396

Cohort\_81  
15-19 y. of a.  
n=478

Cohort\_91  
18-19 y. of a.  
n=231

Health  
outcome

Health  
outcome

Health  
outcome

Controlling  
present  
violence  
exposure in  
each cohort

Controlling social demographics, illness  
burden, family situation and smoking  
each year

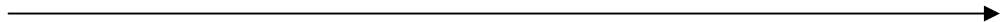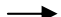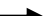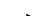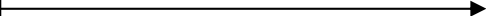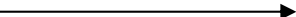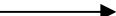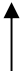

Supplement: MOESM1 [file 9491626]
